# Supplementary material
Source: Elsevier journal article supplement (https://www.sciencedirect.com/science/article/pii/S0300289621000636)
Supplement: mmc1 [file S0300289621000636:mmc1.pdf]

## SUPPLEMENTARY MATERIAL

### Title: **Role of Soluble T-Cell Immunoglobulin Mucin Domain-3 in Differentiating Nontuberculous Mycobacterial Lung Disease from Pulmonary Colonization**

Authors: **Sheng-Wei Pan<sup>a,b,c</sup>, Chin-Chung Shu<sup>d,e,f</sup>, Chang-Ching Lee<sup>a,b</sup>, Jia-Yih Feng<sup>a,b</sup>, Yu-Jiun Chan<sup>c,g,h</sup>, Yuh-Min Chen<sup>a,b</sup> and Wei-Juin Su<sup>a,b</sup>**

Institution:

<sup>a</sup>Department of Chest Medicine, Taipei Veterans General Hospital, Taipei, Taiwan

<sup>b</sup>School of Medicine, National Yang-Ming University, Taipei, Taiwan

<sup>c</sup>Institute of Public Health, National Yang-Ming University, Taipei, Taiwan

<sup>d</sup>Department of Internal Medicine, National Taiwan University Hospital, Taipei, Taiwan

<sup>e</sup>Graduate Institute of Clinical Medicine, National Taiwan University, Taipei, Taiwan

<sup>f</sup>Department of Traumatology, National Taiwan University Hospital, Taipei, Taiwan

<sup>g</sup>Division of Infectious Diseases, Department of Medicine, Taipei Veterans General Hospital, Taipei, Taiwan

<sup>h</sup>Division of Microbiology, Department of Pathology and Laboratory Medicine, Taipei Veterans General Hospital, Taipei, Taiwan

Keywords: Biomarker, Immune checkpoints, Nontuberculous mycobacterial lung disease (NTM-LD); T-cell immunoglobulin and mucin domain–3 (TIM-3)

**Running Title: Soluble TIM-3 and NTM lung disease**

**The corresponding authors:**

**Wei-Juin Su, MD., MPH.**

Department of Chest Medicine, Taipei Veterans General Hospital

No. 201, Sec. 2, Shih-Pai Rd., Taipei, Taiwan.

E-mail: [wjsu.mail@gmail.com](mailto:wjsu.mail@gmail.com)

and

**Jia-Yih Feng, MD., PhD.**

Department of Chest Medicine, Taipei Veterans General Hospital

No. 201, Sec. 2, Shih-Pai Rd., Taipei, Taiwan.

E-mail: [peterofeng@gmail.com](mailto:peterofeng@gmail.com)

## Supplementary material

### Appendix 1. Diagnostic Criteria for Nontuberculous Mycobacterial Lung Disease (NTM-LD)

The American Thoracic Society (ATS)/Infectious Diseases Society of America (IDSA) guideline defines diagnostic criteria for NTM-LD [1]. The criteria were as follows: 1) compatible respiratory symptoms; 2) chest radiography or computed tomography findings compatible with NTM-LD (ie, tree-in-bud patterns, nodular bronchiectasis, or fibrocavitary lesions); 3) culture positivity for NTM in at least 2 sputum samples, one bronchoalveolar lavage, or one lung tissue; and 4) exclusion of alternative diagnosis.

### Appendix 2. Factors Associated with Soluble T-Cell Immunoglobulin Mucin Domain-3 (sTIM-3) Level

Pearson's correlation coefficients,  $r$ , were calculated to assess the associations between continuous variables. The correlation analyses revealed that sTIM-3 levels were positively correlated with advanced age ( $r = .264$ ,  $P = .019$ ), male sex ( $r = .299$ ,  $P = .007$ ), malignancy history ( $r = .247$ ,  $P = .028$ ), prior tuberculosis ( $r = .266$ ,  $P = .018$ ), soluble programmed cell death-1 (sPD-1) ( $r = .511$ ,  $P < .001$ ), and soluble programmed cell death ligand-1 (sPD-L1) levels ( $r = .335$ ,  $P = .003$ ). The sTIM-3 levels were not associated with body mass index, acid-fast bacilli smear status, or radiographic score and patterns.

### Supplemental Reference

1. Griffith DE, Aksamit T, Brown-Elliott BA, et al. An official ATS/IDSA statement: diagnosis, treatment, and prevention of nontuberculous mycobacterial diseases. *Am J Respir Crit Care Med*. 2007;175(4):367-416.

### Supplemental Table S1-S3

**Supplemental Table S1.** Immune checkpoint protein expression in lymphocytes and levels of their soluble forms in patients with flow cytometry data in 2019 (n = 37)

| Variables             | Healthy<br>control<br>(n=11) | NTM-Col<br>(n=11) | NTM-LD<br>(n=15) | P value<br>(ANOVA) | P value<br>for trend | P value<br>(NTM-LD vs<br>NTM-Col) | P value<br>(NTM-LD<br>vs healthy) |
|-----------------------|------------------------------|-------------------|------------------|--------------------|----------------------|-----------------------------------|-----------------------------------|
| Tim-3 expression (%)  |                              |                   |                  |                    |                      |                                   |                                   |
| CD4+ lymphocyte       | 11.6 ± 12.8                  | 13.0 ± 9.6        | 28.6 ± 24.0      | 0.032              | 0.017                | 0.034                             | 0.130                             |
| CD8+ lymphocyte       | 28.3 ± 12.9                  | 36.9 ± 23.1       | 48.3 ± 20.9      | 0.040              | 0.011                | 0.188                             | 0.013                             |
| sTim-3 levels (pg/ml) | 534.4 ± 351.9                | 706.7 ± 347.8     | 476.0 ± 302.7    | 0.218              |                      | 0.084                             | 0.751                             |
| PD-1 expression (%)   |                              |                   |                  |                    |                      |                                   |                                   |
| CD4+ lymphocyte       | 32.8 ± 24.8                  | 27.7 ± 12.0       | 34.1 ± 20.0      | 0.704              | 0.813                | 0.353                             | 0.867                             |
| CD8+ lymphocyte       | 25.9 ± 23.7                  | 28.6 ± 12.7       | 32.1 ± 20.2      | 0.719              | 0.414                | 0.616                             | 0.497                             |
| sPD-1 levels (pg/ml)  | 51.6 ± 34.6                  | 65.7 ± 57.2       | 45.9 ± 27.2      | 0.461              |                      | 0.304                             | 0.642                             |
| PD-L1 expression (%)  |                              |                   |                  |                    |                      |                                   |                                   |
| CD4+ lymphocyte       | 9.8 ± 9.2                    | 12.9 ± 11.5       | 11.4 ± 8.5       | 0.750              | 0.702                | 0.711                             | 0.637                             |
| CD8+ lymphocyte       | 7.0 ± 7.8                    | 11.0 ± 9.8        | 9.4 ± 7.0        | 0.528              | 0.520                | 0.634                             | 0.429                             |
| sPD-L1 levels (pg/ml) | 6.2 ± 7.2                    | 7.3 ± 12.1        | 10.7 ± 30.0      | 0.846              |                      | 0.726                             | 0.635                             |

Continuous data are expressed as mean ± standard deviation (SD).

Abbreviation: ANOVA, analysis of variance; NTM-Col, nontuberculous mycobacterium (NTM) colonization; NTM-LD, NTM lung disease; sPD-1, soluble programmed cell death-1 (PD-1); sPD-L1, soluble programmed cell death ligand-1 (PD-L1); sTIM-3, soluble T-cell immunoglobulin mucin domain-3 (TIM-3).

**Supplemental Table S2.** Subgroup analysis of factors associated with NTM-LD in patients without cavitary lesions (n = 69)

| Variables                               | Univariate           |                | Multivariate, forward selection |                | Multivariate, fully adjusted |                |  |
|-----------------------------------------|----------------------|----------------|---------------------------------|----------------|------------------------------|----------------|--|
|                                         | Crude OR (95% CI)    | <i>p</i> value | Adjusted OR (95% CI)            | <i>p</i> value | Adjusted OR (95% CI)         | <i>p</i> value |  |
| Age (years)                             | 0.988 (0.955-1.022)  | 0.474          | -                               | 0.010          | 0.988 (0.934-1.044)          | 0.663          |  |
| Male sex                                | 0.200 (0.070-0.568)  | 0.002          |                                 |                | 0.161 (0.021-1.214)          | 0.076          |  |
| BMI (Kg/m <sup>2</sup> )                | 0.790 (0.681-0.916)  | 0.002          |                                 |                | 0.837 (0.661-1.059)          | 0.139          |  |
| Ever-smoker                             | 1.969 (0.464-8.361)  | 0.359          |                                 |                |                              |                |  |
| sTim-3 (100-pg/ml increment)            | 0.805 (0.689-0.940)  | 0.006          | 0.712 (0.581-0.873)             | 0.001          | 0.618 (0.450-0.847)          | 0.003          |  |
| Bilateral lung disease                  | 5.224 (1.760-15.505) | 0.003          | -                               | 0.019          |                              |                |  |
| Radiographic score ≥5                   | 5.500 (1.929-15.684) | 0.001          | 5.383 (1.317-22.005)            |                | 8.144 (1.075-61.709)         | 0.042          |  |
| Sputum AFB-smear positivity             | 1.000 (0.364-2.745)  | 1.000          | -                               |                | 2.207 (0.318-15.301)         | 0.423          |  |
| No. of NTM-positive sputum <sup>a</sup> | 1.639 (0.971-2.767)  | 0.064          |                                 |                |                              |                |  |
| MAC subspecies (n=60)                   |                      |                |                                 |                |                              |                |  |
| Other species                           | 1.0 (reference)      |                |                                 |                | 1.0 (reference)              |                |  |
| <i>M. avium complex</i>                 | 2.917 (0.954-14.327) | 0.187          |                                 |                | 3.060 (0.305-30.674)         | 0.342          |  |
| <i>M. abscessus complex</i>             | 5.714 (1.532-21.317) | 0.009          |                                 |                | 31.946 (1.737-555.612)       | 0.017          |  |

<sup>a</sup> The number of NTM-positive sputum samples was not included in the fully adjusted model because it was highly linearly correlated with NTM subspecies.

Abbreviation: AFB, acid-fast bacilli; BMI, body mass index; NTM-LD, nontuberculous mycobacterium (NTM) lung disease; sTIM-3, soluble T-cell immunoglobulin mucin domain-3.

**Supplemental Table S3.** Characteristics of patients classified by number of factors associated with NTM-LD (n = 79)

| Variables                          | 0 factor<br>(n=10) | 1 factor<br>(n=16) | 2 factor<br>(n=34) | 3 factor<br>(n=19) | P values |
|------------------------------------|--------------------|--------------------|--------------------|--------------------|----------|
| Criteria-meeting NTM-LD            | 0                  | 5 (31%)            | 26 (76%)           | 18 (95%)           | <0.001   |
| Age, years                         | 72.6 ± 17.3        | 67.9 ± 8.9         | 70.6 ± 16.5        | 61.4 ± 10.1        | 0.102    |
| Female sex                         | 8 (80%)            | 7 (44%)            | 12 (35%)           | 4 (21%)            | 0.018    |
| BMI ≤22.5 Kg/m <sup>2</sup>        | 0                  | 7 (44%)            | 31 (91%)           | 19 (100%)          | <0.001   |
| sTim-3 ≤530 pg/ml                  | 0                  | 7 (44%)            | 14 (41%)           | 19 (100%)          | <0.001   |
| Radiographic score ≥5              | 0                  | 2 (13%)            | 23 (68%)           | 19 (100%)          | <0.001   |
| Sputum AFB-smear positivity        | 4 (40%)            | 7 (44%)            | 10 (29%)           | 10 (53%)           | 0.404    |
| No. of NTM-positive sputum         | 2 [1-2.25]         | 2 [1.25-2.75]      | 3 [2-3]            | 3 [3-3]            | 0.018    |
| NTM-species (n=68)                 |                    |                    |                    |                    | 0.043    |
| <i>Mycobacterium avium complex</i> | 1/8                | 5/10               | 22/32              | 8/18               |          |
| <i>Mycobacterium abscessus</i>     | 2/8                | 1/10               | 5/32               | 6/18               |          |
| Others                             | 5/8                | 4/10               | 10/32              | 4/18               |          |

Continuous and categorical data are expressed as mean ± standard deviation (SD) and number (%), respectively.

Abbreviation: AFB, acid-fast bacilli; BMI, body mass index; NTM-LD, nontuberculous mycobacterium (NTM) lung disease; sTIM-3, soluble T-cell immunoglobulin mucin domain-3.
